# Supplementary material for: Defining the Role of Essential Genes in Human Disease
Source: PubMed Central journal article supplement (PMC3214036; doi:10.1371/journal.pone.0027368), 2011-11-11

### A Molecular function (binding)

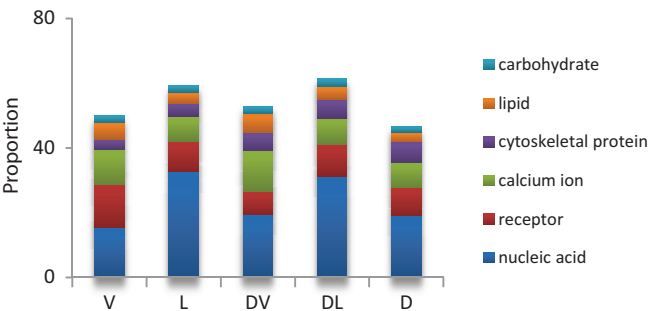

### B Molecular function

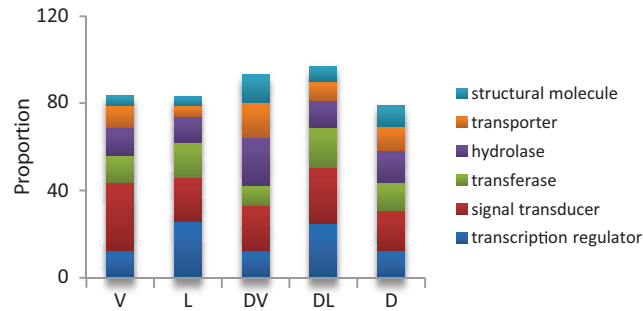

### C

### Biological process

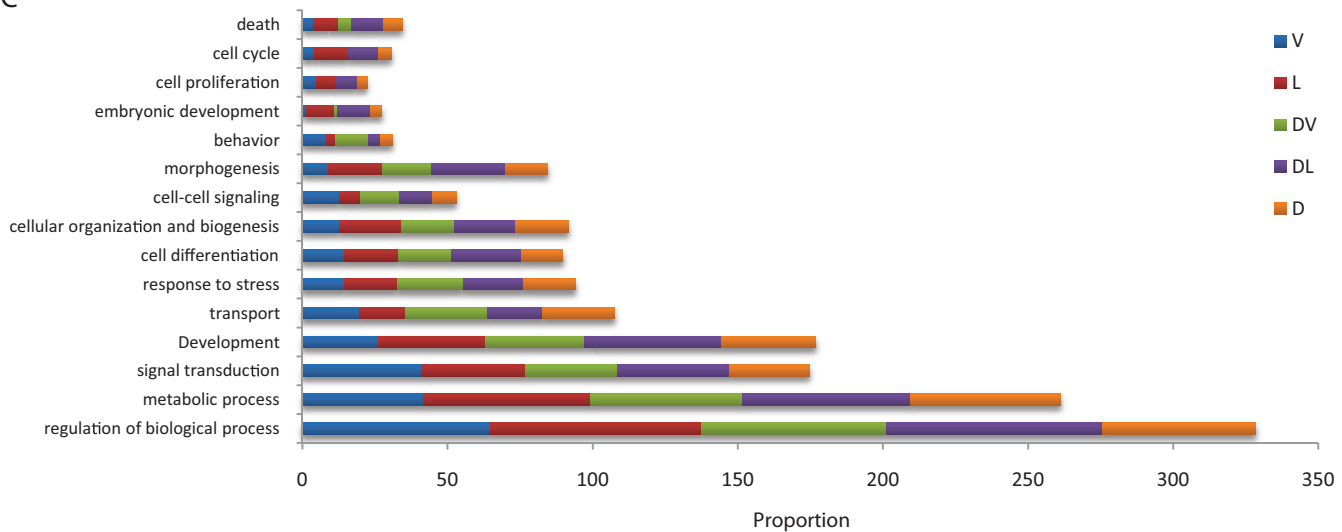

Supplement: pone.0027368.s002.pdf [file pone.0027368.s002.pdf]
